# Supplementary material
Source: HighWire-hosted journal article supplement (https://bmjopen.bmj.com/content/12/2/e056807)
Supplement: inline-supplementary-material-3 [file inline-supplementary-material-3.pdf]

### Supplementary File 3. Search strategy

mothers OR pregnant women

mHealth OR m-health OR mhealth OR mobile health OR mobile app OR mobile applications OR mobile technology OR mobile phone OR smartphone OR smartphone app OR smartphone application OR cell phone OR iPhone OR iPad OR phone OR SMS OR MMS OR text messaging OR voice messaging OR voicemail OR tablet computer OR handheld computers OR personal digital assistant OR PDA OR smart watch OR digital health OR e-MCH OR digital MCH

maternal health OR pregnancy OR childbirth OR obstetric delivery OR antenatal OR prenatal care OR antepartum OR postnatal care OR postpartum period OR perinatal care OR motherhood OR reproductive health OR family planning services OR newborn health OR neonate health OR infant health OR child health OR children health

psychosocial OR psychological OR mental health OR social OR social networking OR social capital OR social participation OR sociological OR sociocultural OR communication OR relations OR emotional OR welfare OR wellbeing OR well-being

behavioral OR behavior OR health-seeking OR information seeking behavior OR patient acceptance of health care OR self care OR self-management OR self-efficacy OR attitude OR conduct OR manner OR demeanor OR disease management OR nature OR performance OR actions OR approach OR practice OR lifestyle

#### PubMed/MEDLINE

"TX ( mothers OR pregnant women ) AND TX ( mHealth OR m-health OR mhealth OR mobile health OR mobile app OR mobile applications OR mobile technology OR mobile phone OR smartphone OR smartphone app OR smartphone application OR cell phone OR iPhone OR iPad OR phone OR SMS OR MMS OR text messaging OR voice messaging OR voicemail OR tablet computer OR handheld computers OR personal digital assistant OR PDA OR smart watch OR digital health OR e-MCH OR digital MCH ) AND TX ( maternal health OR pregnancy OR childbirth OR obstetric delivery OR antenatal OR prenatal care OR antepartum OR postnatal care OR postpartum period OR perinatal care OR motherhood OR reproductive health OR family planning services OR newborn health OR neonate health OR infant health OR child health OR children health ) AND TX ( psychosocial OR psychological OR mental health OR social OR social networking OR social capital OR social participation OR sociological OR sociocultural OR communication OR relations OR emotional OR welfare OR wellbeing OR well-being ) AND TX ( behavioral OR behavior OR health-seeking OR information seeking behavior OR patient acceptance of health care OR self care OR self-management OR self-efficacy OR attitude OR conduct OR manner OR demeanor OR disease management OR nature OR performance OR actions OR approach OR practice OR lifestyle )

#### Web of Science

mothers OR pregnant women (Topic) and mHealth OR m-health OR mhealth OR mobile health OR mobile app OR mobile applications OR mobile technology OR mobile phone OR smartphone OR smartphone app OR smartphone application OR cell phone OR iPhone OR iPad OR phone OR SMS OR MMS OR text messaging OR voice messaging OR voicemail OR tablet computer OR handheld computers OR personal digital assistant OR PDA OR smart watch OR digital health OR e-MCH OR digital MCH (Topic) and maternal health OR pregnancy OR childbirth OR obstetric delivery OR antenatal OR prenatal care OR antepartum OR postnatal care OR postpartum period OR perinatal care OR motherhood OR reproductive health OR family planning services OR newborn health OR neonate health OR infant health OR child health OR children health (Topic) and psychosocial OR psychological OR mental health OR social OR social networking OR social capital OR social participation OR sociological OR sociocultural OR communication OR relations OR emotional OR welfare OR wellbeing OR well-being (Topic) and behavioral OR behavior OR health-seeking OR information seeking behavior OR patient acceptance of health care OR self care OR self-management OR self-efficacy OR attitude OR conduct OR manner OR demeanor OR disease management OR nature OR performance OR actions OR approach OR practice OR lifestyle (Topic) and Articles (Document Types) and English (Languages)

**CINAHL**

"TX ( mothers OR pregnant women ) AND TX ( mHealth OR m-health OR mhealth OR mobile health OR mobile app OR mobile applications OR mobile technology OR mobile phone OR smartphone OR smartphone app OR smartphone application OR cell phone OR iPhone OR iPad OR phone OR SMS OR MMS OR text messaging OR voice messaging OR voicemail OR tablet computer OR handheld computers OR personal digital assistant OR PDA OR smart watch OR digital health OR e-MCH OR digital MCH ) AND TX ( maternal health OR pregnancy OR childbirth OR obstetric delivery OR antenatal OR prenatal care OR antepartum OR postnatal care OR postpartum period OR perinatal care OR motherhood OR reproductive health OR family planning services OR newborn health OR neonate health OR infant health OR child health OR children health ) AND TX ( psychosocial OR psychological OR mental health OR social OR social networking OR social capital OR social participation OR sociological OR sociocultural OR communication OR relations OR emotional OR welfare OR wellbeing OR well-being ) AND TX ( behavioral OR behavior OR health-seeking OR information seeking behavior OR patient acceptance of health care OR self care OR self-management OR self-efficacy OR attitude OR conduct OR manner OR demeanor OR disease management OR nature OR performance OR actions OR approach OR practice OR lifestyle )

**Academic Search Complete**

"TX ( mothers OR pregnant women ) AND TX ( mHealth OR m-health OR mhealth OR mobile health OR mobile app OR mobile applications OR mobile technology OR mobile phone OR smartphone OR smartphone app OR smartphone application OR cell phone OR iPhone OR iPad OR phone OR SMS OR MMS OR text messaging OR voice messaging OR voicemail OR tablet computer OR handheld computers OR personal digital assistant OR PDA OR smart watch OR digital health OR e-MCH OR digital MCH ) AND TX ( maternal health OR pregnancy OR childbirth OR obstetric delivery OR antenatal OR prenatal care OR antepartum OR postnatal care OR postpartum period OR perinatal care OR motherhood OR reproductive health OR family planning services OR newborn health OR neonate health OR infant health OR child health OR children health ) AND TX ( psychosocial OR psychological OR mental health OR social OR social networking OR social capital OR social participation OR sociological OR sociocultural OR communication OR relations OR emotional OR welfare OR wellbeing OR well-being ) AND TX ( behavioral OR behavior OR health-seeking OR information seeking behavior OR patient acceptance of health care OR self care OR self-management OR self-efficacy OR attitude OR conduct OR manner OR demeanor OR disease management OR nature OR performance OR actions OR approach OR practice OR lifestyle )

**PsycINFO**

"TX ( mothers OR pregnant women ) AND TX ( mHealth OR m-health OR mhealth OR mobile health OR mobile app OR mobile applications OR mobile technology OR mobile phone OR smartphone OR smartphone app OR smartphone application OR cell phone OR iPhone OR iPad OR phone OR SMS OR MMS OR text messaging OR voice messaging OR voicemail OR tablet computer OR handheld computers OR personal digital assistant OR PDA OR smart watch OR digital health OR e-MCH OR digital MCH ) AND TX ( maternal health OR pregnancy OR childbirth OR obstetric delivery OR antenatal OR prenatal care OR antepartum OR postnatal care OR postpartum period OR perinatal care OR motherhood OR reproductive health OR family planning services OR newborn health OR neonate health OR infant health OR child health OR children health ) AND TX ( psychosocial OR psychological OR mental health OR social OR social networking OR social capital OR social participation OR sociological OR sociocultural OR communication OR relations OR emotional OR welfare OR wellbeing OR well-being ) AND TX ( behavioral OR behavior OR health-seeking OR information seeking behavior OR patient acceptance of health care OR self care OR self-management OR self-efficacy OR attitude OR conduct OR manner OR demeanor OR disease management OR nature OR performance OR actions OR approach OR practice OR lifestyle )

**PsycArticles: 213**

"TX ( mothers OR pregnant women ) AND TX ( mHealth OR m-health OR mhealth OR mobile health OR mobile app OR mobile applications OR mobile technology OR mobile phone OR smartphone OR smartphone app OR smartphone application OR cell phone OR iPhone OR iPad OR phone OR SMS OR MMS OR text messaging OR voice messaging OR voicemail OR tablet computer OR handheld computers OR personal digital assistant OR PDA OR smart watch OR digital health OR e-MCH OR digital MCH ) AND TX ( maternal health OR pregnancy OR childbirth OR obstetric delivery OR antenatal OR prenatal care OR antepartum OR postnatal care OR postpartum period OR perinatal care OR motherhood OR reproductive health OR family planning services OR newborn health OR neonate health OR infant health OR child health OR children health ) AND TX ( psychosocial

OR psychological OR mental health OR social OR social networking OR social capital OR social participation OR sociological OR sociocultural OR communication OR relations OR emotional OR welfare OR wellbeing OR well-being ) AND TX ( behavioral OR behavior OR health-seeking OR information seeking behavior OR patient acceptance of health care OR self care OR self-management OR self-efficacy OR attitude OR conduct OR manner OR demeanor OR disease management OR nature OR performance OR actions OR approach OR practice OR lifestyle )

**SocINDEX: 324**

"TX ( mothers OR pregnant women ) AND TX ( mHealth OR m-health OR mhealth OR mobile health OR mobile app OR mobile applications OR mobile technology OR mobile phone OR smartphone OR smartphone app OR smartphone application OR cell phone OR iPhone OR iPad OR phone OR SMS OR MMS OR text messaging OR voice messaging OR voicemail OR tablet computer OR handheld computers OR personal digital assistant OR PDA OR smart watch OR digital health OR e-MCH OR digital MCH ) AND TX ( maternal health OR pregnancy OR childbirth OR obstetric delivery OR antenatal OR prenatal care OR antepartum OR postnatal care OR postpartum period OR perinatal care OR motherhood OR reproductive health OR family planning services OR newborn health OR neonate health OR infant health OR child health OR children health ) AND TX ( psychosocial OR psychological OR mental health OR social OR social networking OR social capital OR social participation OR sociological OR sociocultural OR communication OR relations OR emotional OR welfare OR wellbeing OR well-being ) AND TX ( behavioral OR behavior OR health-seeking OR information seeking behavior OR patient acceptance of health care OR self care OR self-management OR self-efficacy OR attitude OR conduct OR manner OR demeanor OR disease management OR nature OR performance OR actions OR approach OR practice OR lifestyle )

**Cochrane: 109**

mothers OR pregnant women in All Text AND mHealth OR m-health OR mhealth OR mobile health OR mobile app OR mobile applications OR mobile technology OR mobile phone OR smartphone OR smartphone app OR smartphone application OR cell phone OR iPhone OR iPad OR phone OR SMS OR MMS OR text messaging OR voice messaging OR voicemail OR tablet computer OR handheld computers OR personal digital assistant OR PDA OR smart watch OR digital health OR e-MCH OR digital MCH in All Text AND maternal health OR pregnancy OR childbirth OR obstetric delivery OR antenatal OR prenatal care OR antepartum OR postnatal care OR postpartum period OR perinatal care OR motherhood OR reproductive health OR family planning services OR newborn health OR neonate health OR infant health OR child health OR children health in All Text AND psychosocial OR psychological OR mental health OR social OR social networking OR social capital OR social participation OR sociological OR sociocultural OR communication OR relations OR emotional OR welfare OR wellbeing OR well-being in All Text AND behavioral OR behavior OR health-seeking OR information seeking behavior OR patient acceptance of health care OR self care OR self-management OR self-efficacy OR attitude OR conduct OR manner OR demeanor OR disease management OR nature OR performance OR actions OR approach OR practice OR lifestyle)

**First search period: until May 31, 2020**

| Database                 | Initial search | After removing duplicates |
|--------------------------|----------------|---------------------------|
| PubMed/MEDLINE           | 696            | 682                       |
| Web of Science           | 63             | 63                        |
| CINAHL                   | 3,059          | 3,064                     |
| Academic Search Complete | 1,328          | 843                       |
| PsycArticles             | 683            | 683                       |
| PsycINFO                 | 4              | 2                         |
| SocINDEX                 | 1,992          | 1,857                     |
| CENTRAL                  | 4              | 3                         |
| <b>TOTAL</b>             | <b>7,856</b>   | <b>7,224</b>              |

Number of duplicates: 632

**Second search period: June 1, 2020 – November 15, 2021**

| Database                 | Initial search | After removing duplicates |
|--------------------------|----------------|---------------------------|
| PubMed/MEDLINE           | 587            | 585                       |
| Web of Science           | 315            | 315                       |
| CINAHL                   | 54             | 50                        |
| Academic Search Complete | 2,502          | 2,444                     |
| PsycArticles             | 213            | 211                       |
| PsycINFO                 | 12             | 6                         |
| SocINDEX                 | 324            | 149                       |
| CENTRAL                  | 109            | 109                       |
| <b>TOTAL</b>             | <b>4,116</b>   | <b>3,869</b>              |

Number of duplicates: 247
