# Supplementary material
Source: HighWire-hosted journal article supplement (https://bmjopen.bmj.com/content/12/2/e056807)
Supplement: inline-supplementary-material-7 [file inline-supplementary-material-7.pdf]

**Supplementary File 7. GRADE Summary of Findings**

Patient or population: Pregnant women and mothers

Intervention: Use of mobile health

Comparison: Standard care

| Outcomes                   | Impact                                                                                                                                   | No. of participants (studies)                                                   | Quality of evidence (GRADE) |
|----------------------------|------------------------------------------------------------------------------------------------------------------------------------------|---------------------------------------------------------------------------------|-----------------------------|
| <b>Anxiety symptoms</b>    | Four studies found positive impact on anxiety symptoms, six studies had mixed findings, and three studies found no significant change.   | 4497<br>(8 RCT; 5 quasi-experimental)                                           | ⊕⊕○○<br>LOW                 |
| <b>Depressive symptoms</b> | Five studies found positive impact on depressive symptoms, two studies had mixed findings, and four studies found no significant change. | 892<br>(5 RCT; 5 quasi-experimental; 1 mixed methods; 1 qualitative)            | ⊕⊕○○<br>LOW                 |
| <b>Perceived stress</b>    | Three studies found positive impact on perceived stress, two studies had mixed findings, and two studies found no significant change.    | 857<br>(4 RCT; 3 quasi-experimental)                                            | ⊕○○○<br>VERY LOW            |
| <b>Mental well-being</b>   | One study found a positive impact on mental well-being, while one study did not find a significant change.                               | 508<br>(1 quasi-experimental; 1 cohort)                                         | ⊕○○○<br>VERY LOW            |
| <b>Coping</b>              | One study reported mixed impact on coping, while one study reported no significant change.                                               | 215<br>(1 RCT; 1 quasi-experimental)                                            | ⊕○○○<br>VERY LOW            |
| <b>Self-efficacy</b>       | Seven studies found positive impact on self-efficacy, two studies had mixed findings, and seven studies found no significant change.     | 1744<br>(7 RCT; 4 quasi-experimental; 3 qualitative; 1 mixed methods; 1 cohort) | ⊕⊕○○<br>LOW                 |
| <b>Self-management</b>     | All five studies found a positive impact on self-management of health.                                                                   | 182<br>(1 RCT; 2 mixed methods; 2 qualitative)                                  | ⊕⊕○○<br>LOW                 |

|                                                                                                                                                                                                                                                                                                                                                                                                                                                                                                                                                                                                                                                                                                                                               |                                                                                                                                                                     |                                                               |                  |
|-----------------------------------------------------------------------------------------------------------------------------------------------------------------------------------------------------------------------------------------------------------------------------------------------------------------------------------------------------------------------------------------------------------------------------------------------------------------------------------------------------------------------------------------------------------------------------------------------------------------------------------------------------------------------------------------------------------------------------------------------|---------------------------------------------------------------------------------------------------------------------------------------------------------------------|---------------------------------------------------------------|------------------|
| <b>Acceptance</b>                                                                                                                                                                                                                                                                                                                                                                                                                                                                                                                                                                                                                                                                                                                             | Three studies found a positive impact on acceptance of pregnancy and motherhood.                                                                                    | 328<br>(1 quasi-experimental; 1 descriptive; 1 qualitative)   | ⊕○○○<br>VERY LOW |
| <b>Social support from partners</b>                                                                                                                                                                                                                                                                                                                                                                                                                                                                                                                                                                                                                                                                                                           | Four studies found a positive impact on social support from partners.                                                                                               | 560<br>(1 RCT; 2 qualitative; 1 descriptive)                  | ⊕○○○<br>VERY LOW |
| <b>Social support from healthcare providers</b>                                                                                                                                                                                                                                                                                                                                                                                                                                                                                                                                                                                                                                                                                               | Three studies found a positive impact on social support from healthcare providers.                                                                                  | 519<br>(1 quasi-experimental; 1 mixed methods; 1 qualitative) | ⊕○○○<br>VERY LOW |
| <b>Social support from other sources</b>                                                                                                                                                                                                                                                                                                                                                                                                                                                                                                                                                                                                                                                                                                      | Six studies found a positive impact on social support from other sources, while three studies reported mixed findings and one study reported no significant change. | 622<br>(3 RCT; 4 mixed methods; 2 qualitative; 1 descriptive) | ⊕⊕○○<br>LOW      |
| RCT: randomized controlled trial                                                                                                                                                                                                                                                                                                                                                                                                                                                                                                                                                                                                                                                                                                              |                                                                                                                                                                     |                                                               |                  |
| <p><b>GRADE Working Group grades of evidence:</b></p> <p><b>High quality:</b> We are very confident that the true effect lies close to that of the estimate of the effect.</p> <p><b>Moderate quality:</b> We are moderately confident in the effect estimate: The true effect is likely to be close to the estimate of the effect, but there is a possibility that it is substantially different</p> <p><b>Low quality:</b> Our confidence in the effect estimate is limited: The true effect may be substantially different from the estimate of the effect.</p> <p><b>Very low quality:</b> We have very little confidence in the effect estimate: The true effect is likely to be substantially different from the estimate of effect</p> |                                                                                                                                                                     |                                                               |                  |
